# Supplementary material for: Incidence, duration and risk factors associated with delayed and missed diagnostic opportunities related to tuberculosis: a population-based longitudinal study
Source: PubMed Central journal article supplement — BMJ Open. 2021 Feb 18;11(2):e045605. doi: 10.1136/bmjopen-2020-045605 (PMC7896623; doi:10.1136/bmjopen-2020-045605), 2021-02-18

**Supplementary Material****Supplementary Table 1** - List of SSDs used to identify potential diagnostic opportunities.

| Category                                          | Symptomatically Similar Diagnosis (SSD) | ICD-9-CM                                                                                                                                                                                                                  | ICD-10-CM                                                                                                                                                                                                                 |
|---------------------------------------------------|-----------------------------------------|---------------------------------------------------------------------------------------------------------------------------------------------------------------------------------------------------------------------------|---------------------------------------------------------------------------------------------------------------------------------------------------------------------------------------------------------------------------|
| Alternative-Cardio-Sino-Pulmonary-Based Diagnoses | Tonsillitis                             | 474.12, 474.2, 474.8, 474.9                                                                                                                                                                                               | J35.1                                                                                                                                                                                                                     |
|                                                   | Respiratory Failure                     | 517.3, 518.81, 518.82, 518.83, 518.84, 799.1                                                                                                                                                                              | J80, J96.00, J96.01, J96.02, J96.10, J96.12, J96.20, J96.21, J96.22, J96.90, J96.92                                                                                                                                       |
|                                                   | Respiratory Cancer                      | 163.0, 163.1, 163.8, 163.9, 165.0, 165.8, 165.9, 231.1, 231.8, 231.9                                                                                                                                                      | C33, C38.4, C39.0, C39.9, C45.0, D02.1, D02.3, D02.4                                                                                                                                                                      |
|                                                   | Pleurisy Pneumothorax                   | 511.0, 511.1, 511.8, 511.89, 512.0, 512.8, 512.81, 512.82, 512.83, 512.84, 512.89, 518.1, 518.2                                                                                                                           | J86.9, J92.0, J92.9, J93.0, J93.12, J93.81, J93.82, J93.83, J94.0, J94.1, J94.2, J94.8, J94.9, J98.19, J98.2, J98.3, R09.1                                                                                                |
|                                                   | Other Upper Respiratory Disease         | 472.0, 477.0, 477.2, 477.8, 477.9, 478.1, 478.19, 478.20, 478.29, 478.30, 478.31, 478.32, 478.33, 478.34, 478.4, 478.5, 478.70, 478.74, 478.75, 478.79, 478.8, 519.1, 519.11, 519.19, 519.3, 784.40, 784.49, 784.7, 784.8 | J30.0, J30.1, J30.2, J30.81, J30.89, J30.9, J31.0, J34.2, J34.89, J37.0, J37.1, J38.00, J38.01, J38.02, J38.1, J38.2, J38.3, J38.4, J38.5, J38.6, J38.7, J39.2, J39.3, J39.8, J39.9, J98.01, J98.51, R04.0, R04.1, R09.81 |
|                                                   | Other Lower Respiratory Disease         | 514, 515, 516.0, 516.1, 516.2, 516.3, 516.30, 516.31, 516.32, 516.33, 516.34,                                                                                                                                             | J81.0, J81.1, J82, J84.01, J84.02, J84.03, J84.09, J84.10, J84.111, J84.112, J84.113, J84.114, J84.115, J84.116,                                                                                                          |

|  |                                     |                                                                                                                                                                                               |                                                                                                                                                                                                                                                                                                       |
|--|-------------------------------------|-----------------------------------------------------------------------------------------------------------------------------------------------------------------------------------------------|-------------------------------------------------------------------------------------------------------------------------------------------------------------------------------------------------------------------------------------------------------------------------------------------------------|
|  |                                     | 516.35, 516.36, 516.37, 516.4, 516.5, 516.8, 516.9, 517.2, 517.8, 518.3, 518.4, 518.89, 519.4, 519.8, 519.9, 786.00, 786.09, 786.39, 786.9, 793.11, 794.2                                     | J84.117, J84.17, J84.2, J84.81, J84.82, J84.89, J84.9, J98.4, J98.6, J98.8, J99, R04.89, R04.9                                                                                                                                                                                                        |
|  | Lung Disease Due to External Agents | 495.0, 495.1, 495.2, 495.3, 495.4, 495.5, 495.6, 495.7, 495.8, 495.9, 500, 501, 502, 503, 504, 505, 506.0, 506.1, 506.2, 506.3, 506.4, 506.9, 507.1, 507.8, 508.0, 508.1, 508.2, 508.8, 508.9 | J60, J61, J62.0, J62.8, J63.0, J63.1, J63.2, J63.3, J63.4, J63.5, J63.6, J64, J66.0, J66.1, J66.2, J66.8, J67.0, J67.1, J67.2, J67.3, J67.4, J67.5, J67.6, J67.7, J67.8, J67.9, J68.0, J68.1, J68.2, J68.3, J68.4, J68.8, J68.9, J69.1, J69.8, J70.0, J70.1, J70.2, J70.3, J70.4, J70.5, J70.8, J70.9 |
|  | Lung Cancer                         | 162.2, 162.3, 162.4, 162.5, 162.8, 162.9, 209.21                                                                                                                                              | C34.00, C34.01, C34.02, C34.10, C34.11, C34.12, C34.2, C34.30, C34.31, C34.32, C34.80, C34.81, C34.82, C34.90, C34.91, C34.92, C7A.090, D02.20, D02.21, D02.22                                                                                                                                        |
|  | Hemoptysis                          | 786.39                                                                                                                                                                                        | R04.8, R04.89, R04.9                                                                                                                                                                                                                                                                                  |
|  | COPD                                | 491.2, 491.20, 491.21, 491.22, 492.0, 492.8, 494, 494.0, 494.1, 496                                                                                                                           | J41.8, J43.0, J43.1, J43.2, J43.8, J43.9, J44.1, J44.9, J47.1, J47.9                                                                                                                                                                                                                                  |
|  | Asthma                              | 493.00, 493.01, 493.02, 493.10, 493.11, 493.12, 493.20, 493.21, 493.22, 493.81, 493.82, 493.90, 493.92                                                                                        | J45.20, J45.21, J45.22, J45.30, J45.31, J45.32, J45.40, J45.41, J45.42, J45.50, J45.51, J45.52, J45.901, J45.902, J45.909, J45.990, J45.991, J45.998                                                                                                                                                  |
|  | Aspiration Pneumonitis              | 507.0                                                                                                                                                                                         | J69.0                                                                                                                                                                                                                                                                                                 |

|                                                       |                                          |                                                                                                                                                                                                                                                                                                                                                                                              |                                                                                                                                                                                                                                                                                                                                                                    |
|-------------------------------------------------------|------------------------------------------|----------------------------------------------------------------------------------------------------------------------------------------------------------------------------------------------------------------------------------------------------------------------------------------------------------------------------------------------------------------------------------------------|--------------------------------------------------------------------------------------------------------------------------------------------------------------------------------------------------------------------------------------------------------------------------------------------------------------------------------------------------------------------|
|                                                       | Additional Codes                         | 135, 197.0, 212.3,<br>235.7, 239.1,<br>289.1, 416.8,<br>423.9, 428.0,<br>446.4                                                                                                                                                                                                                                                                                                               | I50.9, J85.0, N39.0                                                                                                                                                                                                                                                                                                                                                |
| Alternative-Infectious-<br>Disease-Based<br>Diagnoses | Tonsillitis                              | 463, 474.0,<br>474.00, 474.01,<br>474.02, 474.10,<br>474.11, 475                                                                                                                                                                                                                                                                                                                             | J03.80, J03.81, J03.90,<br>J03.91, J35.01, J35.02,<br>J35.03, J35.2, J35.3,<br>J35.8, J35.9, J36                                                                                                                                                                                                                                                                   |
|                                                       | Pneumonia                                | 112.4, 114.0,<br>114.4, 115.05,<br>115.15, 115.95,<br>130.4, 136.3,<br>480.0, 480.1,<br>480.2, 480.8,<br>480.9, 481, 482.0,<br>482.1, 482.2,<br>482.3, 482.30,<br>482.31, 482.32,<br>482.39, 482.4,<br>482.40, 482.41,<br>482.42, 482.49,<br>482.8, 482.81,<br>482.83, 482.84,<br>482.89, 482.9,<br>483, 483.0, 483.1,<br>483.8, 484.1,<br>484.3, 484.6,<br>484.7, 484.8, 485,<br>486, 513.0 | A31.0, A37.01, A37.11,<br>A43.0, A48.1, B25.0,<br>B37.1, B38.0, B38.1,<br>B38.2, B39.0, B39.1,<br>B39.2, B58.3, B59,<br>B77.81, J12.0, J12.1,<br>J12.2, J12.3, J12.89,<br>J12.9, J13, J14, J15.0,<br>J15.1, J15.20, J15.211,<br>J15.212, J15.29, J15.3,<br>J15.4, J15.5, J15.6, J15.7,<br>J15.8, J15.9, J16.0, J16.8,<br>J17, J18.0, J18.1, J18.8,<br>J18.9, J85.1 |
|                                                       | Pleurisy<br>Pneumothorax                 | 510.0                                                                                                                                                                                                                                                                                                                                                                                        | J86.0, J93.11                                                                                                                                                                                                                                                                                                                                                      |
|                                                       | Other Upper-<br>Respiratory<br>Infection | 460, 461.0, 461.1,<br>461.2, 461.3,<br>461.9, 462, 464.0,<br>464.00, 464.01,<br>464.11, 464.20,<br>464.21, 464.30,<br>464.31, 464.4,<br>464.50, 464.51,<br>465.0, 465.8,<br>465.9, 473.0,<br>473.1, 473.2,<br>473.3, 473.8,<br>473.9                                                                                                                                                         | J00, J01.00, J01.01,<br>J01.10, J01.11, J01.20,<br>J01.21, J01.30, J01.31,<br>J01.40, J01.41, J01.80,<br>J01.81, J01.90, J01.91,<br>J02.0, J02.8, J02.9,<br>J03.00, J03.01, J04.0,<br>J04.10, J04.11, J04.2,<br>J04.30, J04.31, J05.0,<br>J05.10, J05.11, J06.0,<br>J06.9, J32.0, J32.1, J32.2,<br>J32.3, J32.4, J32.8, J32.9,<br>R09.82                           |

|                                                  |                                 |                                                                                 |                                                                                                                                            |
|--------------------------------------------------|---------------------------------|---------------------------------------------------------------------------------|--------------------------------------------------------------------------------------------------------------------------------------------|
|                                                  | Other Upper Respiratory Disease | 472.2, 476.0, 476.1, 478.21, 478.22, 478.24, 478.71, 478.9, 519.2               | J31.1, J31.2, J39.0, J39.1, J98.09, J98.5, J98.59, R07.0                                                                                   |
|                                                  | Other Lower Respiratory Disease | 513.1                                                                           | J18.2, J22, J85.2, J85.3, J98.9, R06.6, R06.82                                                                                             |
|                                                  | Influenza                       | 487.0, 487.1, 487.8, 488, 488.1, 488.11, 488.12, 488.19, 488.81, 488.82, 488.89 | J09.X1, J09.X2, J09.X3, J09.X9, J10.00, J10.01, J10.08, J10.1, J10.2, J10.89, J11.00, J11.08, J11.1, J11.2, J11.81, J11.82, J11.83, J11.89 |
|                                                  | COPD                            | 490, 491.0, 491.1, 491.8, 491.9                                                 | J40, J41.0, J41.1, J42, J44.0, J47.0                                                                                                       |
|                                                  | Bronchitis                      | 466.0, 466.1, 466.11, 466.19                                                    | J20.0, J20.1, J20.2, J20.3, J20.4, J20.5, J20.6, J20.7, J20.8, J20.9, J21.0, J21.1, J21.8, J21.9                                           |
|                                                  | Additional Codes                | 038.9, 079.99, 310, 340, 391, 599.0, 830, 995.91                                | A41.9, B34.9, D14.30, D38.1, D49.1, D86.0, D86.9                                                                                           |
| Symptom-Based Diagnoses                          | Other Upper Respiratory Disease | 784.1, 784.41, 784.42, 784.9, 784.99                                            | R49.0, R49.8, R49.9                                                                                                                        |
|                                                  | Other Lower Respiratory Disease | 786.02, 786.05, 786.07, 786.2, 786.3, 786.30, 786.4, 786.52                     | R04.2, R05, R06.00, R06.01, R06.02, R06.03, R06.09, R06.2, R06.89, R06.9, R07.1, R07.81, R09.3                                             |
|                                                  | Hemoptysis                      | 786.3, 786.30                                                                   | R04.2                                                                                                                                      |
|                                                  | Fever                           | 780.6, 780.60, 780.61                                                           | R50, R50.81, R50.9                                                                                                                         |
|                                                  | Cough                           | 786.2                                                                           | R05                                                                                                                                        |
|                                                  | Additional Codes                | 780.79, 780.8, 783.21, 786.50, 786.51, 786.59                                   | R07.2, R07.82, R07.89, R07.9, R53.1, R53.81, R53.83, R61, R63.4                                                                            |
| Testing-Imaging-or Physical-Exam-Based Diagnoses | Pleurisy Pneumothorax           | 511.9, 518.0                                                                    | J90, J91.8, J93.9, J98.11                                                                                                                  |
|                                                  | Other Lower Respiratory Disease | 786.6, 786.7, 793.1, 793.19                                                     | R09.02, R91.1, R91.8                                                                                                                       |
|                                                  | Additional Codes                | 263.9, 276.1, 285.29, 285.9, 288.60, 289.3,                                     | D64.9, D72.829, E871, I51.7, R00.0, R22.0,                                                                                                 |

|                        |  |                                                                                                                      |                                           |
|------------------------|--|----------------------------------------------------------------------------------------------------------------------|-------------------------------------------|
|                        |  | 429.3, 782.2,<br>784.2, 785.0,<br>785.6, 799.02,<br>799.4                                                            | R22.1, R22.2, R59, R59.0,<br>R59.1, R59.9 |
| <b>Procedure Codes</b> |  | <b>CPT Code</b>                                                                                                      |                                           |
| CT – Chest             |  | 71260, 71250, 71270                                                                                                  |                                           |
| X-ray - Chest          |  | 71010, 71015, 71020, 71021, 71022, 71023,<br>71030, 71034, 71035, 71101, 71111,<br>71120, 71045, 71046, 71047, 71048 |                                           |

**Supplementary Table 2** – ILI Indicators for the optimal ILI cutoff. We used AIC to select the optimal cutoff for defining peak ILI activity; this was determined to be an ILI level >3.8%.

| Period                  | ILI >= 3.8% |
|-------------------------|-------------|
| 2001/01/01 - 2001/01/14 | 0           |
| 2001/01/15 - 2001/02/04 | 1           |
| 2001/02/05 - 2003/11/23 | 0           |
| 2003/11/24 - 2003/12/28 | 1           |
| 2003/12/29 - 2005/01/23 | 0           |
| 2005/01/24 - 2005/02/20 | 1           |
| 2005/02/21 - 2008/01/20 | 0           |
| 2008/01/21 - 2008/03/09 | 1           |
| 2008/03/10 - 2009/08/30 | 0           |
| 2009/08/31 - 2009/11/15 | 1           |
| 2009/11/16 - 2011/01/16 | 0           |
| 2011/01/17 - 2011/02/20 | 1           |
| 2011/02/21 - 2012/12/09 | 0           |
| 2012/12/10 - 2013/01/27 | 1           |
| 2013/01/28 - 2013/12/22 | 0           |
| 2013/12/23 - 2014/01/05 | 1           |
| 2014/01/06 - 2014/12/14 | 0           |
| 2014/12/15 - 2015/01/25 | 1           |
| 2015/01/26 - 2017/01/15 | 0           |
| 2017/01/16 - 2017/02/19 | 1           |
| 2017/02/20 - 2017/12/10 | 0           |
| 2017/12/11 - 2017/12/24 | 1           |

**Supplementary Figure 1** – Trend in SSD visits and all visits prior to the index tuberculosis diagnoses broken down by type of healthcare setting. The red lines depict all visits, and the blue line depicts visits with SSD-related conditions.

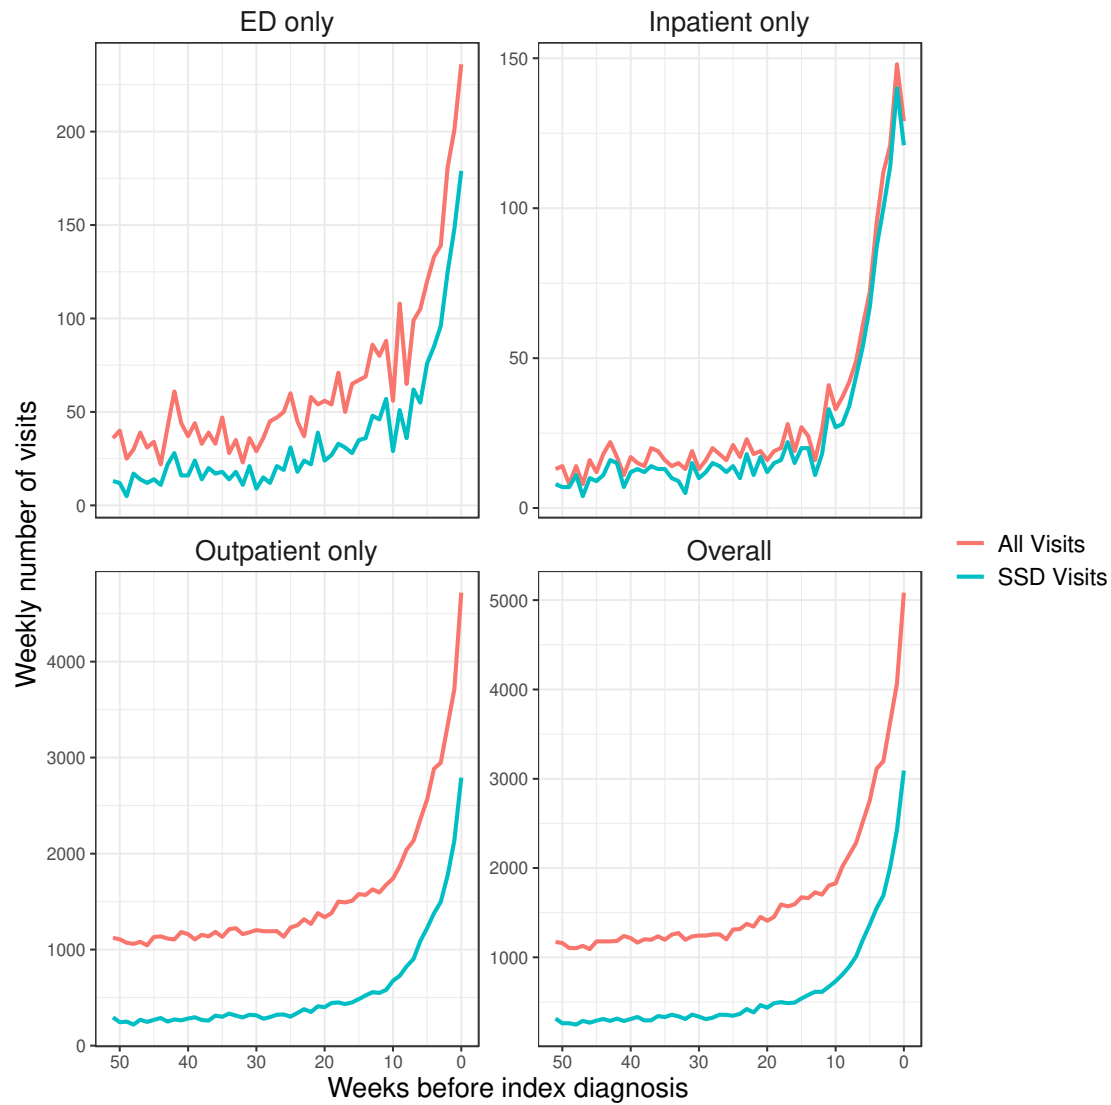

**Supplementary Figure 2** – Trend in SSD visits prior to diagnosis for the four SSD categories.

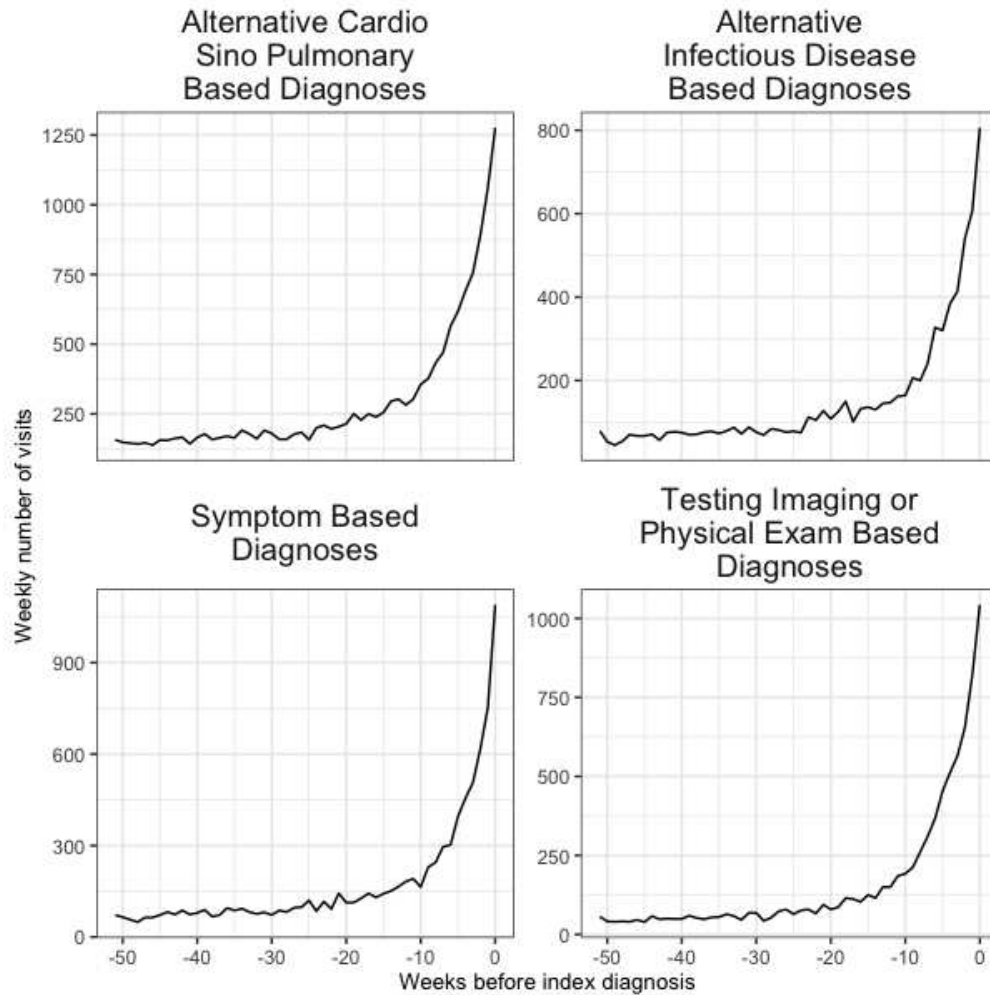

Supplement: bmjopen-2020-045605supp001.pdf [file bmjopen-2020-045605supp001.pdf]
